# Supplementary material
Source: Springer Nature journal article supplement (https://www.springermedizin.de/resource/supplementary/12943_2014_1385_MOESM2_ESM.pdf/9552860)

Figure S2

A

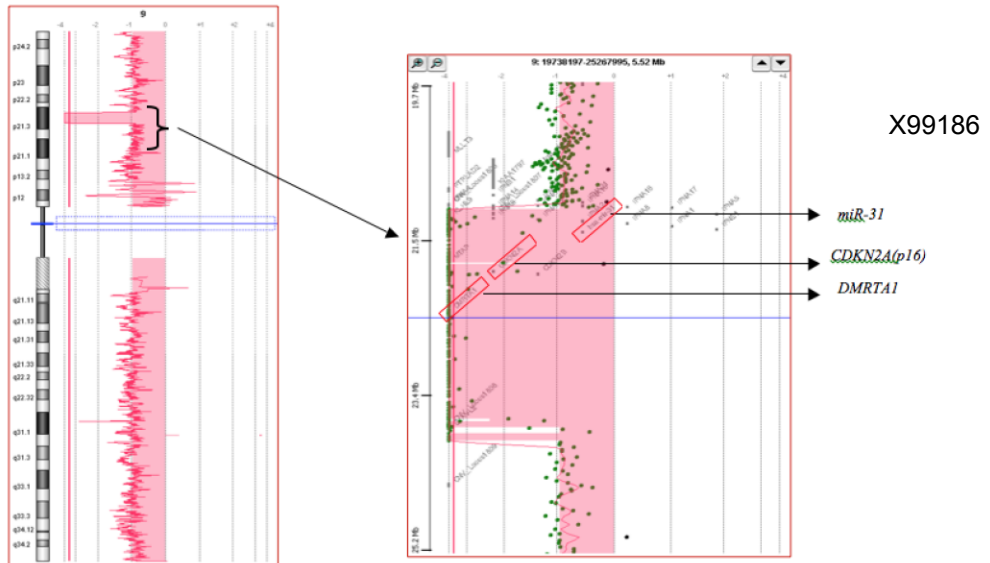

B

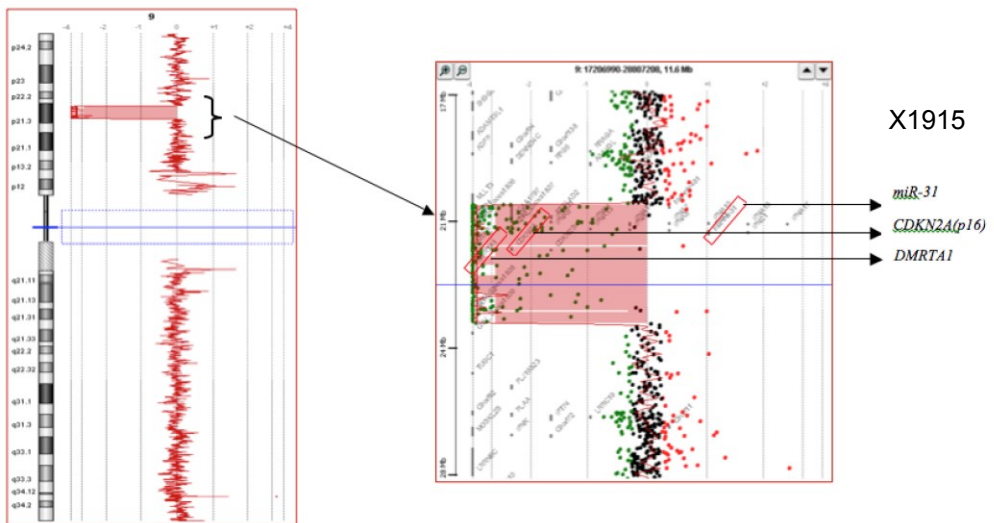

C

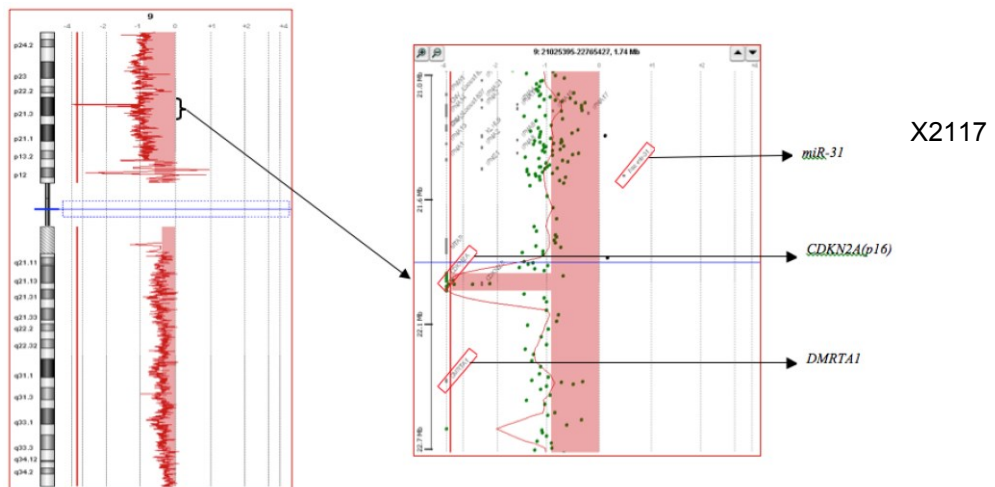

Supplement: MOESM2 [file 9552860]
